# Supplementary material for: Cell-Membrane-Coated Metal–Organic Framework Nanocarrier Combining Chemodynamic Therapy for the Inhibition of Hepatocellular Carcinoma Proliferation
Source: MDPI journal article supplement (doi:10.3390/pharmaceutics16050619), 2024-05-05
Supplement: s1 [file s1]

## Supporting Information

# Cell membrane-coated MOF nanocarrier combining CDT for inhibition of hepatocellular carcinoma proliferation and metastasis

Huaying Xie <sup>1,†</sup>, Xuhua Xiao <sup>2,†</sup>, Xiaoyuan Yi<sup>1</sup>, Kunzhao Huang<sup>1</sup>, Qingyu Zeng<sup>1</sup>, Feifei He<sup>2</sup>, Liyan Wang<sup>2,\*</sup>

1 The First School of Clinical Medicine, Guilin Medical University, Guilin 541000, P.R. China.

2 Department of Gastroenterology, Affiliated Hospital of Guilin Medical University, Guilin 541000, P.R. China.

\* Correspondence: 168wangliyan@163.com; Tel.: 15295953938.

† These authors contributed equally to this work.

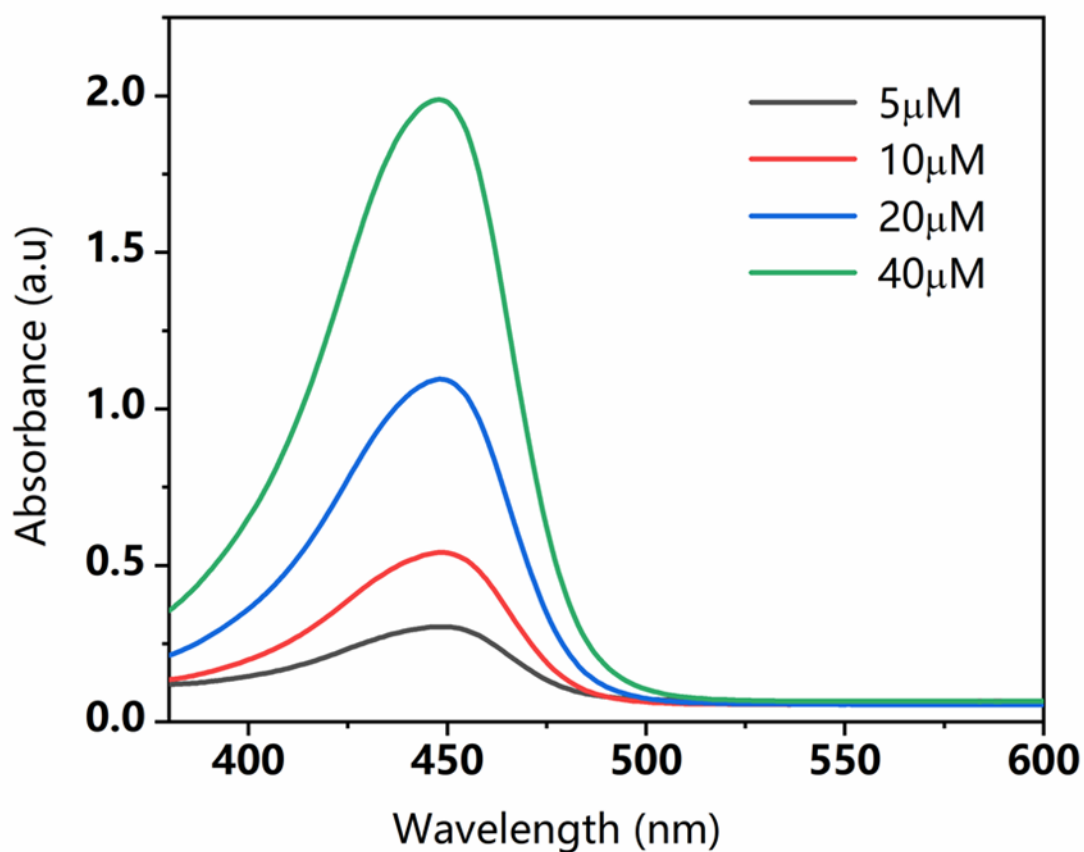

**Figure S1.** UV-vis absorption spectra of ACF in H<sub>2</sub>O solution at different concentrations.

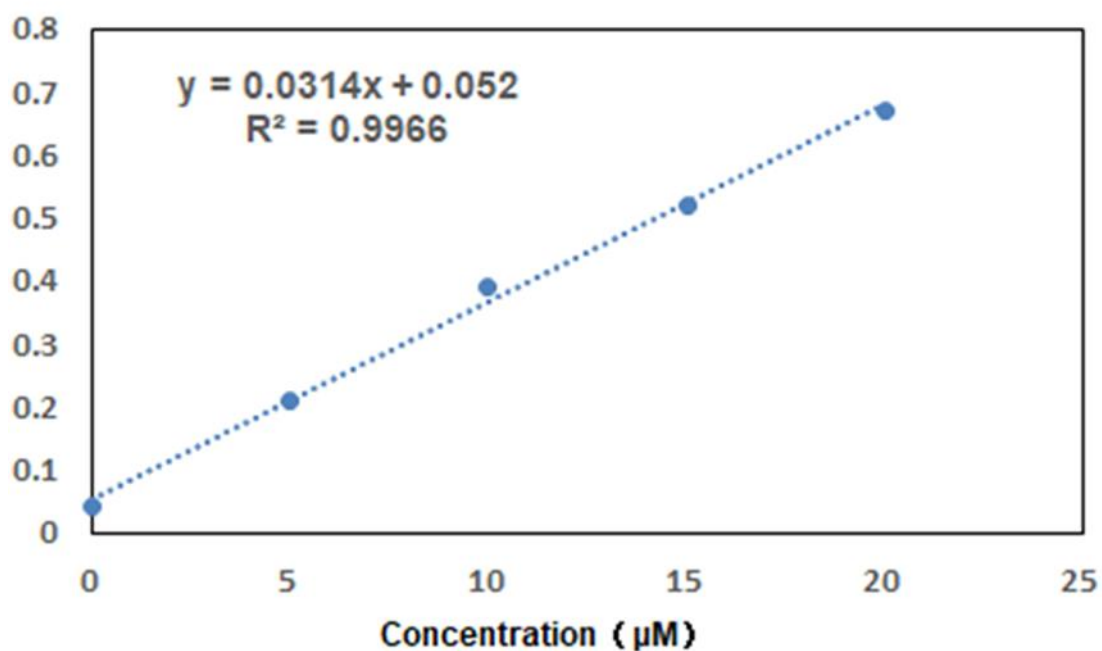

**Figure S2.** The linearly fitted standard curve of ACF characteristic absorption intensity at 460 nm vs concentration.

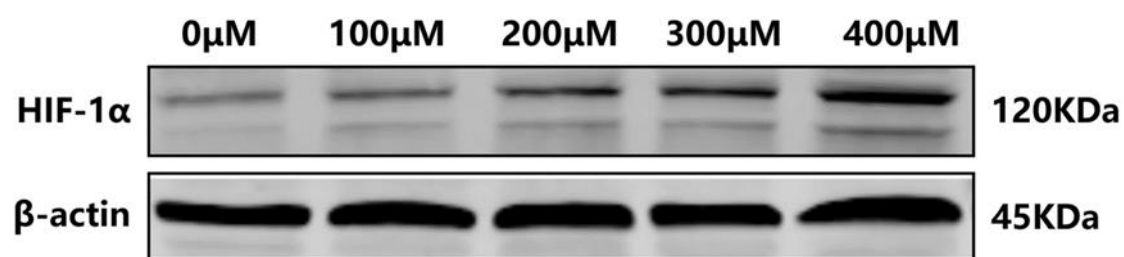

**Figure S3.** Western blot bands of hypoxia-related proteins (i.e., HIF-1α) in Hepa1-6 cells after incubating with CoCl<sub>2</sub> with varied concentrations.

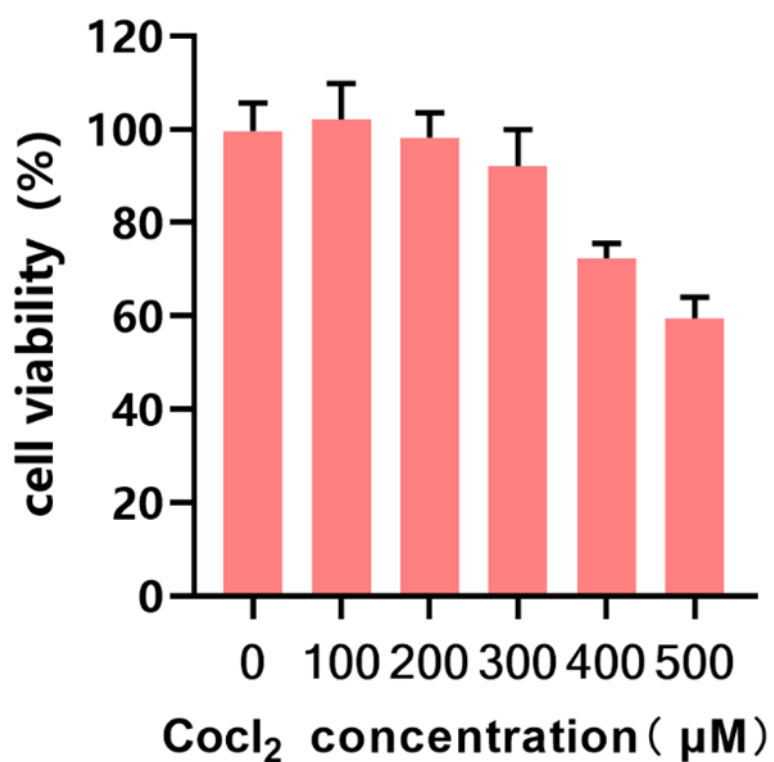

**Figure S4.** Cell viability of Hepa1-6 cells after incubating with CoCl<sub>2</sub> with varied concentrations.

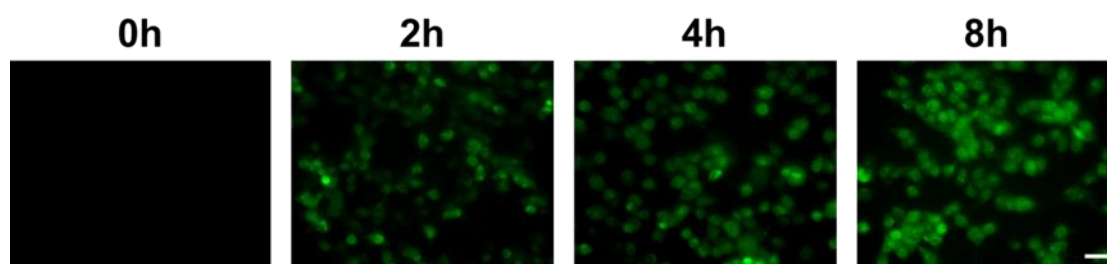

**Figure S5.** Cell internalization of MIL-101/ACF@CCM nanoagents by Hepa1-6 cells.

Scale bar: 50  $\mu\text{m}$ .

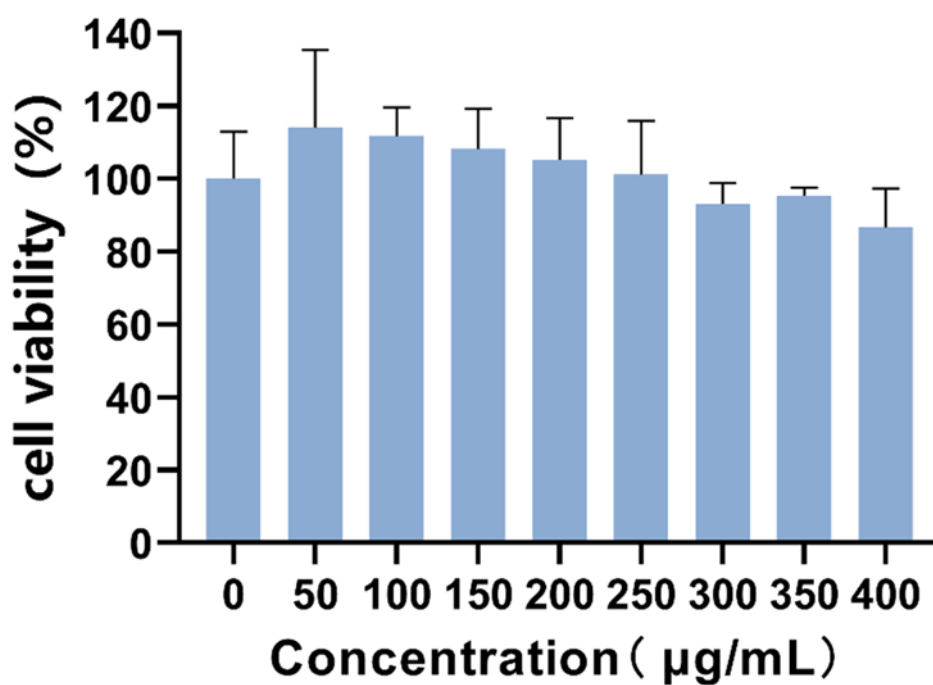

**Figure S6.** Cell viabilities of THLE-2 cells after incubation with varied concentrations of MIL-101/ACF@CCM nanoagents for 24 h.

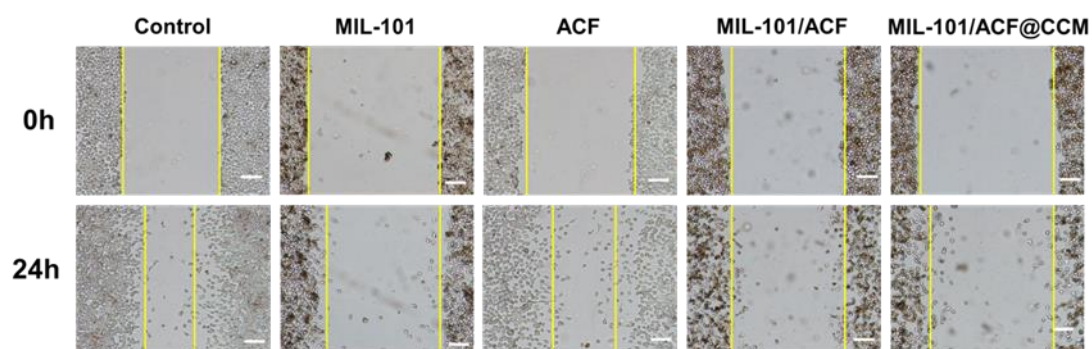

**Figure S7.** Images of wound healing of hypoxic Hepa1-6 cells after different treatments.

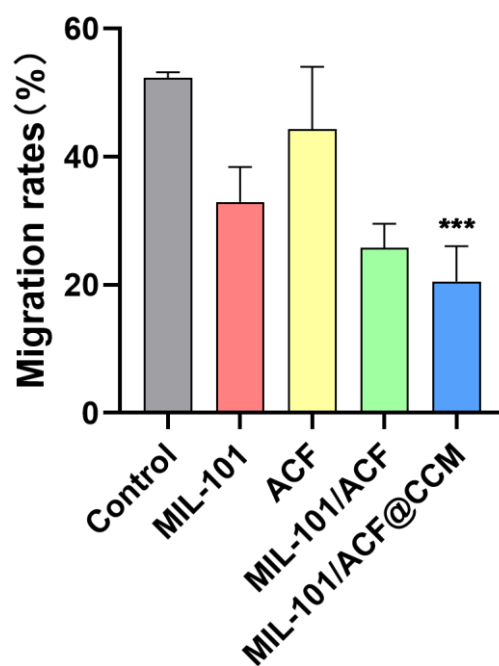

**Figure S8.** Statistical graph of cell migration distance obtained according to Figure S7. n=3. \*\*\* $p < 0.001$ .

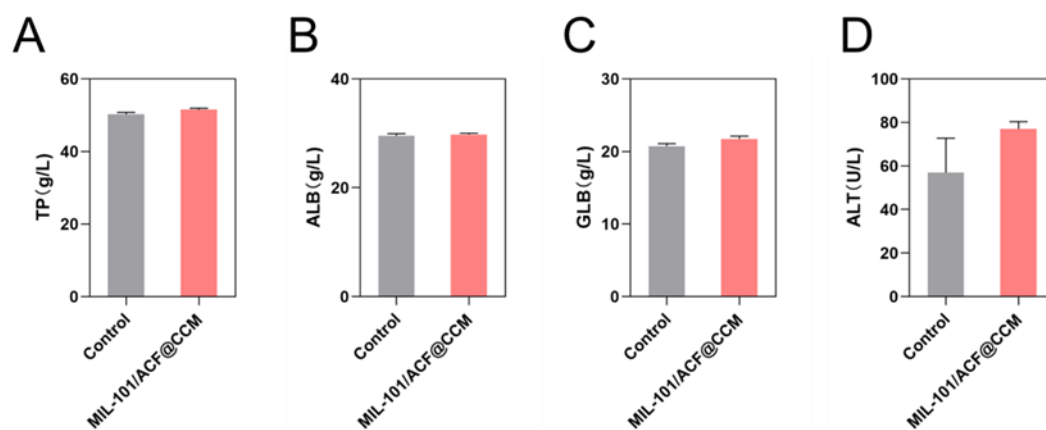

**Figure S9.** Serum biochemistry assay of mice injected with or without MIL-101/ACF@CCM.

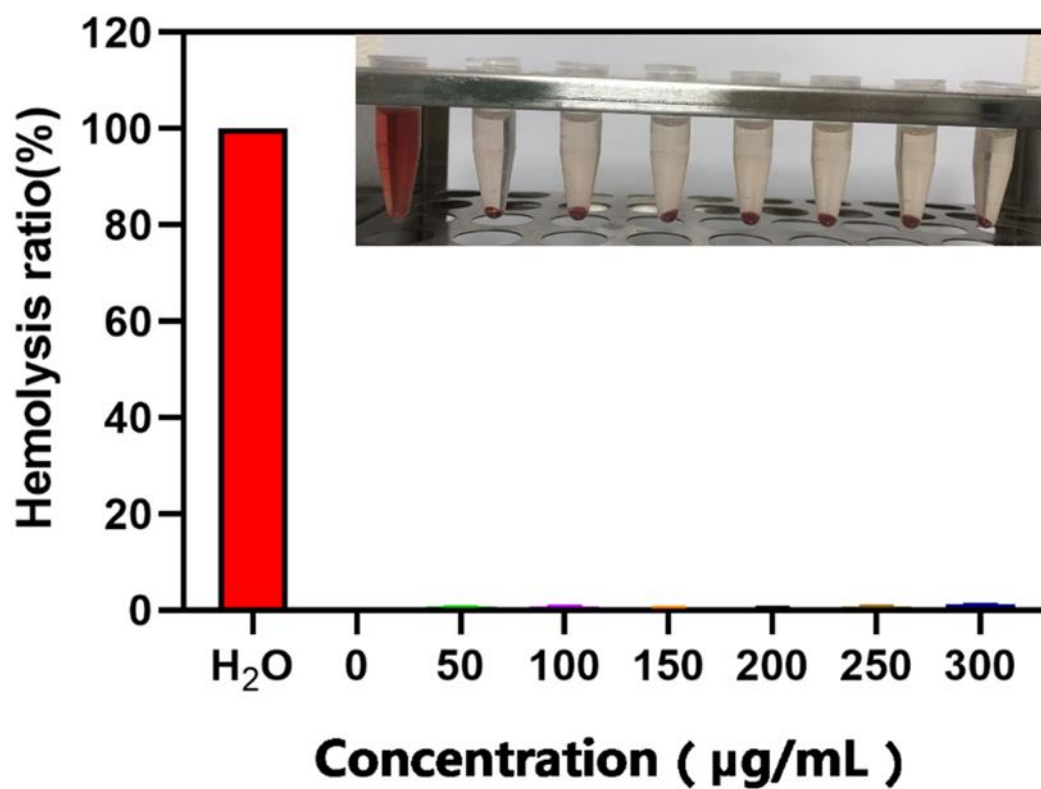

**Figure S10.** In vitro hemolysis with different concentrations of MIL-101/ACF@CCM.

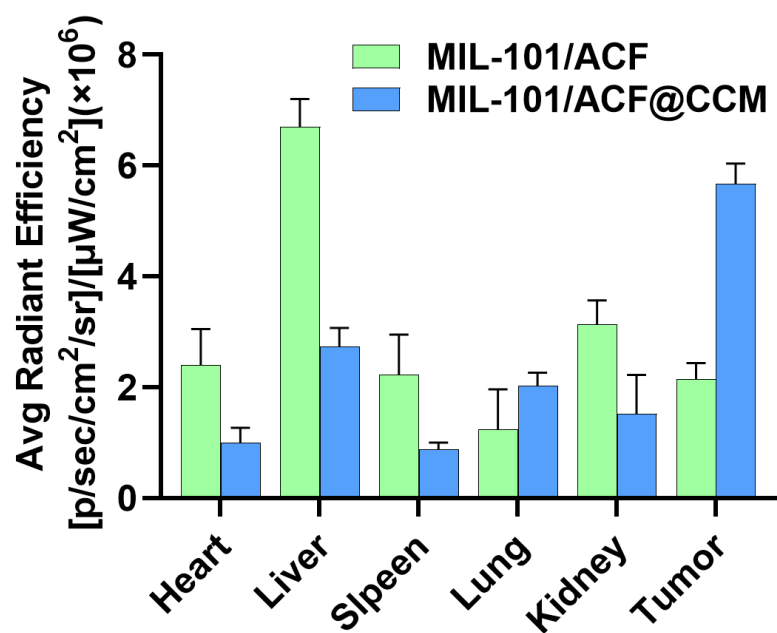

**Figure S11.** The quantitation of fluorescence from each organ ex vivo (n = 3).

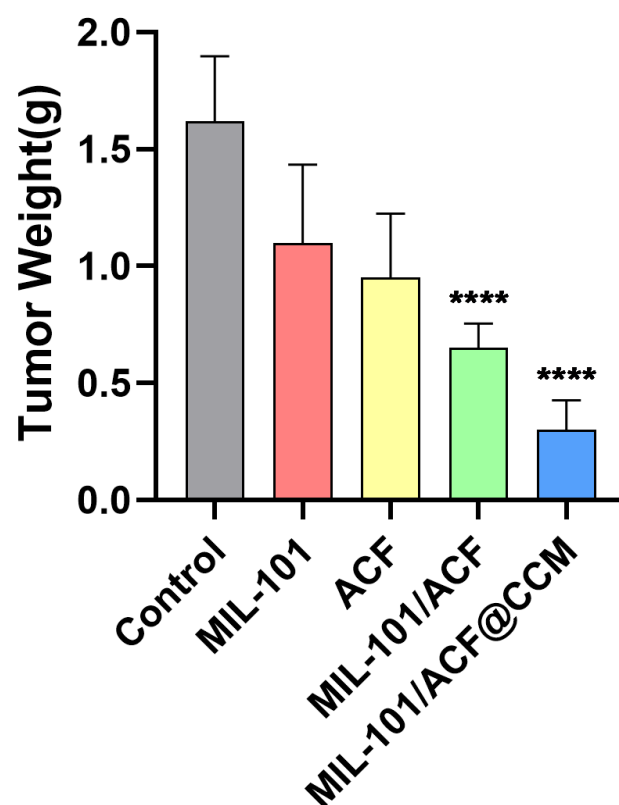

**Figure S12.** The tumor weights of excised tumors at the end of treatment after (n = 6).  
\*\*\*\* $p < 0.0001$ .
